1 Differentiation of human induced pluripotent stem cells into  
2 functional airway epithelium.

3 Engi Ahmed <sup>1,#</sup>, Mathieu Fieldes <sup>1,#</sup>, Chloé Bourguignon <sup>1</sup>, Joffrey Mianné <sup>1</sup>, Aurélie Petit<sup>2</sup>,  
4 Charlotte Vernisse<sup>3</sup>, Myriam Jory<sup>4</sup>, Chantal Cazevieille<sup>5</sup>, Hassan Boukhaddaoui<sup>5,6</sup>, James P.  
5 Garnett<sup>7,8</sup>, Gladys Massiera<sup>4</sup>, Isabelle Vachier<sup>2</sup>, Said Assou<sup>1</sup>, Arnaud Bourdin<sup>2, 3,\*</sup>, John De  
6 Vos<sup>1,9,\*</sup>

7 <sup>1</sup> IRMB, Univ Montpellier, INSERM, CHU Montpellier, Montpellier, France

8 <sup>2</sup> Department of Respiratory Diseases, Univ Montpellier, CHU Montpellier, INSERM,  
9 Montpellier, France

10 <sup>3</sup> Centre PhyMedExp, Univ Montpellier, INSERM U1046, Montpellier, France.

11 <sup>4</sup> Centre National de la Recherche Scientifique UMR 5221, Laboratoire Charles Coulomb,  
12 Univ Montpellier, Montpellier, France

13 <sup>5</sup> Institut des Neurosciences de Montpellier, Univ Montpellier, Montpellier, France

14 <sup>6</sup> Montpellier Ressources Imagerie (MRI), Univ Montpellier, Montpellier, France

15 <sup>7</sup> Immunology & Respiratory Diseases Research, Boehringer Ingelheim Pharma GmbH & Co.  
16 KG, Biberach an der Riss, Germany

17 <sup>8</sup> Translational and Clinical Research Institute, Newcastle University, Newcastle upon Tyne,  
18 United Kingdom

19 <sup>9</sup> Department of Cell and Tissue Engineering, Univ Montpellier, CHU Montpellier,  
20 Montpellier, France

21 # \* These authors contributed equally to this work

22 \* Co-senior authors

23

24

25 **Corresponding authors:**

26 Arnaud Bourdin, Department of Respiratory Diseases, Hôpital Arnaud de Villeneuve,  
27 Montpellier, France. Email: [a-bourdin@chu-montpellier.fr](mailto:a-bourdin@chu-montpellier.fr)

28 John De Vos, Department of Cell and Tissue Engineering, Hôpital Saint-Eloi, 80 Avenue  
29 Augustin Fliche, 34295 Montpellier Cedex 5, France. Email: [john.devos@inserm.fr](mailto:john.devos@inserm.fr)

30

31 **Key words:** airway epithelium; chronic obstructive pulmonary disease; primary ciliary  
32 dyskinesia; disease modeling; human induced pluripotent stem cells.

33

34

35 **Abstract**

36

37 **Rationale**

38 Highly reproducible *in vitro* generation of human bronchial epithelium from pluripotent stem  
39 cells is an unmet key goal for drug screening to treat lung diseases. The possibility of using  
40 induced pluripotent stem cells (hiPSC) to model normal and diseased tissue *in vitro* from a  
41 simple blood sample will reshape drug discovery for chronic lung, monogenic and infectious  
42 diseases.

43 **Methods**

44 We devised a simple and reliable method that drives a blood sample reprogrammed into  
45 hiPSC subsequently differentiated within 45 days into air-liquid interface bronchial

46 epithelium (iALI), through key developmental stages, definitive-endoderm (DE) and  
47 Ventralized-Anterior-Foregut-Endoderm (vAFE) cells.

## 48 **Results**

49 Reprogramming blood cells from one healthy and 3 COPD patients, and from skin-derived  
50 fibroblasts obtained in one PCD patient, succeeded in 100% of samples using Sendai viruses.  
51 Mean cell purity at DE and vAFE stages was greater than 80%, assessed by expression of  
52 CXCR4 and NKX2.1, avoiding the need of cell sorting. When transferred to ALI conditions,  
53 vAFE cells reliably differentiated within 4 weeks into bronchial epithelium with large zones  
54 covered by beating ciliated, basal, goblets, club cells and neuroendocrine cells as found *in*  
55 *vivo*. Benchmarking all culture conditions including hiPSCs adaptation to single-cell  
56 passaging, cell density and differentiation induction timing allowed for consistently producing  
57 iALI bronchial epithelium from the five hiPSC lines.

## 58 **Conclusions**

59 Reliable reprogramming and differentiation of blood-derived hiPSCs into mature and  
60 functional iALI bronchial epithelium is ready for wider use and this will allow better  
61 understanding lung disease pathogenesis and accelerating the development of novel gene  
62 therapies and drug discovery.

63

64 **Introduction**

65 Chronic obstructive pulmonary disease (COPD), is one of the leading causes of death  
66 worldwide [1]. Induced pluripotent stem cells (iPSCs) represent an attractive opportunity  
67 compared with the existing solutions to model chronic airway diseases because they can yield  
68 a virtually unlimited amount of any differentiated cell type [2]. The recent description of  
69 protocols to differentiate human pluripotent stem cells (PSCs) into bronchial epithelium has  
70 been encouraging [3–11]. Overall, these protocols rely on the knowledge gathered on normal  
71 lung development in mammals [12]. Briefly, lung embryogenesis starts with the formation of  
72 the definitive endoderm (DE). During the 4<sup>th</sup> week of human embryonic development, the  
73 primitive gut appears and can be divided into foregut, midgut, and hindgut. Early pulmonary  
74 development starts from the ventral area of the anterior foregut endoderm (vAFE). From this  
75 zone, which is characterized by the expression of the transcription factor NKX2.1, the  
76 respiratory diverticulum will emerge and form the trachea, and then bronchi, bronchioles, and  
77 alveoli. These steps can be recapitulated *in vitro* by differentiating PSCs first into DE and  
78 then by driving DE cells towards vAFE differentiation [13]. Finally, vAFE cells are  
79 specifically differentiated into lung progenitors and then bronchial cells. However, the  
80 protocols for PSC differentiation into bronchial epithelium present several limitations, and  
81 multiplicity of protocols were rarely described in detail. Most of them are effective on a very  
82 limited number of cell lines, most often healthy control cells and require an enrichment step  
83 based on a specific NKX2.1+ cell selection at the vAFE stage using flow cytometry and cell  
84 surface markers (e.g. carboxypeptidase M (CPM)+ cells [9] or CD47<sup>hi</sup>CD26<sup>lo</sup> cells [14]), or a  
85 final differentiation step in 3D culture conditions . Others require important technical skills  
86 and are difficult to replicate [15].

87 Here, we developed an approach to differentiate human iPSCs (hiPSCs) into proximal airway  
88 epithelium, using a straightforward protocol without any cell purification step. Careful in-  
89 home reprogramming and then culture adaptation to single-cell passaging together with a  
90 precise timing and reagent benchmarking for each differentiation step led to the successful  
91 generation of fully differentiated and functional bronchial epithelium in air-liquid interface  
92 (ALI) culture conditions from hiPSCs (iALI bronchial epithelium). We successfully used this  
93 protocol to differentiate five hiPSC lines, among which three were derived from patients with  
94 severe COPD. This study highlights the criticality of evaluating expansion and differentiation  
95 conditions for achieving optimal phenotypic and functional endpoints such as ciliary beat  
96 frequency (CBF), mucus flow velocity, presence of differentiated cells, transepithelial  
97 electrical resistance (TEER). This simple protocol to produce hiPSC-derived bronchial  
98 epithelium in ALI culture conditions (iALI bronchial epithelium) will facilitate modelling  
99 airway diseases developing novel gene or cell therapies, and drug discovery.

100

101

## 102 **Results**

### 103 **Reprogramming from a blood sample or skin-derived fibroblasts**

104 Skin-derived fibroblasts from the patient with primary cilia dyskinesia (PCD) [16] or  
105 peripheral blood mononuclear cells from the healthy control and the three patients with severe  
106 COPD and were reprogrammed using Sendai virus to generate the PCD02.30, HY03,  
107 iCOPD2, iCOPD8, and iCOPD9 hiPSC lines, respectively (figure 1). From venepuncture,  
108 PBMC were Ficoll-isolated and cultured using STEM SPAN SFEMII ® kit enriched with  
109 cytokines (IL3, SCF, EPO) promoting Erythroid Progenitor (EP) expansion. CD45, CD34,  
110 CD71 and CD36 monitoring were required to optimize yield of EP expansion before Sendai  
111 virus transduction. C-myc, KLF4, SOX2 and OCT4-containing Sendai viruses were  
112 concomitantly added once to the EP culture for three days. After transfer into Geltrex, hiPSC  
113 clones were observed 30 days after blood sampling. Pluripotency was confirmed by  
114 demonstrating phosphatase alkaline activity, cell surface SSEA3/4 and TRA1-60 expression,  
115 and OCT4, NANOG, SOX2 mRNA expression. HiPSC genetic integrity was assessed by  
116 ddPCR (iCS digital) (supplemental figure 2A and B) [18]. One of the COPD-reprogrammed  
117 iPSC clones (iCOPD2) was found to harbour one genomic abnormality, copy number gain in  
118 20q11.21, yet differentiation could still be achieved with this clone.

### 119 **Adaptation of hiPSCs to single-cell culture is mandatory for a successful differentiation** 120 **process and allows high rate of definitive endoderm induction.**

121 The differentiation protocol, is schematized in figure 2A. To develop a robust differentiation  
122 protocol, we benchmarked the timing, the cell density and the method of passaging, factors  
123 that were crucial for achieving reliable rates of DE purity and quality. hiPSC lines were  
124 passaged as single cells because hiPSC clumps were partly resistant to DE induction, as  
125 evidenced by OCT4 expression persistence. Optimal cell adaptation was obtained by gentle

126 colony dissociation into small clumps for five passages, and then into single cells for at least  
127 5-10 passages, using Versene (EDTA) in the presence of Y-27632 (figure 2B). Adaptation to  
128 single-cell passaging was deemed mandatory to prevent massive cell death after cell plating  
129 for APS induction (Figure 2C). Then, the differentiation process was started by adding activin  
130 A, and CHIR99021 (a GSK3 inhibitor that acts as a WNT pathway agonist) in the presence of  
131 the ROCK inhibitor Y-27632 for one day (day 1; Anterior Primitive Streak figure 2A and  
132 supplemental table 3) followed by activin A, LDN-193189 and Y-27632 for 1-2 days, leading  
133 to DE induction (day 2-3, figure 3A). To optimize the protocol, various intervals between  
134 hiPSC plating and anterior primitive streak (APS) induction, as well as different cell densities  
135 (from 70 to 130K cells/cm<sup>2</sup>) were tested (figure 2D-E). Indeed, plating cells at too low density  
136 led to important cell death, whereas too high density led to persistent and sustained OCT4  
137 expression (figure 2F). This optimized protocol robustly yielded in average more than 80% of  
138 CXCR4+ DE cells within 2-3 days, and was validated using the five hiPSC lines described  
139 above and compared with one human embryonic stem cell (ESC) and two other hiPSC lines  
140 (n=170 independent experiments, using eight PSC lines) (figure 3A-C and supplemental  
141 figure 3). Moreover, DE cells expressed characteristic endoderm transcription factors FOXA2  
142 and SOX17 (figure 3D-E). Pluripotent markers NANOG, SOX2 and OCT4 progressively  
143 switched off with the stage progression (figure 4E).

144

#### 145 **Efficient induction of high purity NKX2.1+ lung progenitors without need for cell** 146 **sorting**

147 The comparison of various combinations of growth factors for vAFE induction showed that  
148 DE cells needed minimal cell signalling, and therefore, were grown in RPMI1640 basal  
149 medium with B27 minus vitamin A (figure 2A and Supplemental tables 2, 4 and 5). For



150 efficient vAFE induction, a DE cell population with at least 80% of CXCR4+ cells was  
151 required. Time course experiments showed that at 24-36 hours after LDN-193189 addition,  
152 there was a narrow window when cells exhibited optimal conditions (i.e. high CXCR4  
153 expression and high viability) for vAFE induction. 3D bud-like structures emerging between  
154 days 4-8 appeared to be a good morphological indicator of vAFE differentiation at optical  
155 microscopy (figure 3A, red arrows). In these conditions, >80% of cells consistently expressed  
156 NKX2.1, as indicated by flow cytometry and confirmed by immunolabelling, in six different  
157 PSC lines (n=46 independent experiments ) (figure 4 A and B, supplemental figure 3). The  
158 optimum percentage of NKX2.1+ cells (>80%) was observed around day 3 after vAFE  
159 induction (figure 4C). This result was confirmed by time course immunostaining at v-AFE,  
160 with gradual increase of NKX2.1 expression over the time (Supplemental figure 4A). This  
161 NKX2.1 expression level was required to induce an efficient differentiation process towards  
162 iALI. Interestingly, we were able to detect SOX2, SOX9 expression at protein level by  
163 immunostaining. Three populations were observed, SOX2+/SOX9-, SOX2-/SOX9+ and  
164 bipotent progenitors SOX2+/SOX9+, as previously reported *in vivo* during human lung  
165 development (figure 4D, supplemental figure 4B) [19]. Extinction of pluripotency markers  
166 such as OCT4 and NANOG expression were observed at this stage, compared with the DE  
167 stage (figure 4E-G). NKX2.1 bronchial progenitor cells exhibited a high proliferation rate,  
168 assessed by Ki67 labelling (Supplemental figure 4C). Terminal airway epithelial markers  
169 were not detected during v-AFE induction, ascertaining the immature feature of these  
170 progenitor cells, consistent with other human iPSC protocol differentiation [14] and *in vivo*  
171 mouse lung development [19] [20]. As NKX2.1 is also expressed in other developing tissues  
172 (figure 4F), we assessed the purity of NKX2.1 cells by confirming the absence of  
173 contamination by RT-qPCR analysis of specific mRNA for thyroid gland (thyroglobulin  
174 (TG)) and brain (Paired Box 6 (PAX6)) cell markers, as well as gut (caudal type homeobox 2

175 (CDX2)) markers (figure 4G). Absence of liver contamination was confirmed at both mRNA  
176 and protein level (alpha-fetoprotein (AFP)) (figure 4G, supplemental figure 4D).

177 **Specification of NKX2.1 lung progenitor cells under 2D ALI culture conditions lead to**  
178 **functional, multi ciliated airway epithelium.**

179 iPSC-derived ALI (iALI) bronchial epithelium was obtained from five different iPSC lines  
180 (n>3 independent experiments per cell line). v-AFE cells were mechanically dissociated into  
181 small clumps and plated at high density on Transwell inserts in PneumaCult-Ex Plus medium  
182 (Day 9, figure 2A). At day 2 post-seeding in PneumaCult-Ex Plus medium, cells were  
183 progressively switched to PneumaCult-ALI maintenance medium. Four days after seeding on  
184 Transwell inserts, medium was removed from the apical side to switch to ALI culture  
185 (“polarization”). DAPT, a  $\gamma$ -secretase inhibitor that blocks NOTCH signal transduction, was  
186 added to the culture medium present in the basolateral part of the Transwell from day 14 to  
187 day 28 post ALI (figure 2A and supplemental table 3).

188

189 ***Epithelium with barrier function***

190 iPSC-derived epithelial cells reached confluence after the four days of submerged growth  
191 conditions (figure 3A). Features consistent with epithelium could be identified by : i) optical  
192 microscopy at late iALI stage (day 42+; figure 5A) ii) immunolabeling of E-cadherin protein  
193 (figure 5A) and iii) adherent junctions presence (junctional complexes) assessed by  
194 transmission electron microscopy of day 34 post-ALI cultures (Supplemental figure 5A).  
195 Barrier integrity of cells during ALI 2D-culture differentiation was assessed by transepithelial  
196 electric resistance (TEER). TEER increased significantly during the differentiation process  
197 (Supplemental figure 5B), reaching around  $300 \Omega \cdot \text{cm}^2$  and could be maintained for >200 days  
198 of culture.

199

200 ***iALI generates both major and rare solitary human airway epithelial cells***

201 After 45 days of differentiation, the main bronchial epithelium cell types were observed: basal  
202 cells (KRT5 and TP63), ciliated cells (tubulin beta 4, TUBIV), goblet cells (mucin-5AC,  
203 MUC5AC), club cells (CCSP, SCGB1A1) and neuroendocrine cells (chromogranin A,  
204 CHGA) (figure 5B to F). Club cells and goblet cells could be detected in iALI culture as early  
205 as day 14 (figure 5G and I). MUC5AC positive cells were detected by immunofluorescence  
206 (figure 5E and G) and supported by a protein release in the supernatant detected by Dot blot  
207 analysis, alcian blue staining and Periodic acid Schiff (PAS) (figure 5H and I). Interestingly,  
208 we were able to detect either CCSP<sup>+</sup>/MUC5AC<sup>-</sup> cells and CCSP<sup>-</sup>/MUC5AC<sup>+</sup> but also a small  
209 number of double positive CCSP<sup>+</sup>/MUC5AC<sup>+</sup> cells as soon as day 14 post ALI (figure 5G),  
210 confirmed by colocalization confocal analysis (Supplemental figure 5C). Scanning electron  
211 microscopy (SEM) revealed the formation of mucin bundles in culture (Supplemental figure  
212 5A, right lower panels). Concentration of secreted CCSP ranged from 23 to 486 ng/mL,  
213 depending on the cell line and experiment (figure 5H). Neuroendocrine cells were also  
214 detected both at mRNA and protein level, assessed by CHGA (figures 5F, K). Finally, SEM  
215 and TEM acquisitions suggested the presence of another rare epithelial subset of cells  
216 harbouring microvilli, also known as brush/tuft cells (Supplemental figure 5A, red asterisk),  
217 previously described in proximal airway and in terminal bronchioles [21,22].

218

219 ***Functional multiciliated cells airway epithelium***

220 Ciliogenesis was revealed by observation of cilia beating by optical microscopy and by  
221 TUBIV immunofluorescent labelling (figure 6A). Multiciliated cells were identified by  
222 immunofluorescence labelling only after 21 to 28 days post-ALI in all five iPSC derived lines  
223 irrespective of the underlying disease. Dynein axonemal heavy chain 5 (DNAH5) staining

224 was observed throughout the ciliary axoneme (Supplemental figure 5D). The morphology of  
225 multiciliated cells was examined using optical microscopy and electron microscopy, either by  
226 SEM or TEM (figure 6B-C). TEM cilia structure was characterized as expected by a nine  
227 peripheral doublet and a central pair of singlet microtubules (figure 6C), specific of motile  
228 cilia [23].

229 Cilia length in iALI was assessed by both optical microscopy and SEM and compared with  
230 freshly acquired epithelial cells obtained during endoscopic brushing and classical ALI-  
231 cultured airway epithelium. Average cilia length was roughly similar in ALI and iALI when  
232 measured either by optical microscopy or SEM (figure 6D). No obvious difference in cilia  
233 length was observed between COPD patient-derived iALI and healthy patient-derived iALI or  
234 ALI or bronchial brushing. We were able to observe cilia beating using a high-speed camera  
235 after isolation of patches of iALI epithelium (Supplemental movie 1), but also on Transwell  
236 membrane (Supplemental movie 2). In addition, we acquired cilia beating by live  
237 immunostaining using SiR-conjugated fluorogenic probes, SiR-tubulin (Supplemental movie  
238 3).

239 To establish the mucociliary clearance capacity of the 2D cultures, CBF and mucociliary flow  
240 were recorded. iALI cultures had a CBF of  $14.3 \pm 1.8$  Hz, consistent with the frequency of  
241 ciliated cells from ALI-cultured primary airway epithelium (figure 6E) [24].

242 Cultures presented structures with high density of ciliated cells actively beating, giving rise  
243 occasionally to localized vortexes (figure 6E, left bottom panel, Supplemental movie 2). The  
244 estimated flow velocity of the vortex was approximately  $5.6 \pm 6.5$   $\mu\text{m/s}$ . The iALI bronchial  
245 epithelia maintained beating cilia for more than 300 days without cell passaging and without  
246 aneuploidy appearance (Supplemental figure 2B). Moreover, cultures could be passaged at  
247 least three times after iALI generation.

248



## 250 **Discussion**

251 In this study, we described the generation of iALI bronchial epithelium highlighting an  
252 attractive alternative to animal models and *ex vivo* cultures of differentiated bronchial  
253 epithelium from endobronchial biopsies. Our differentiation protocol offers a virtually  
254 unlimited source of homogeneous reliable human bronchial epithelium. Importantly, this  
255 protocol was carried out successfully by four different members of the research group, at least  
256 3 times for each cell lines.

257 We identified several critical factors that ensure the efficiency and reproducibility of airway  
258 epithelium differentiation from human PSCs. First, reprogramming and differentiation were  
259 achieved in the same facility by the same team and we do believe this greatly helped for  
260 optimally handling hiPSC and decide when to optimally start differentiation for example,  
261 selection of clones should be cautious, relying on 1) absence of peripheral signs of  
262 spontaneous differentiation, 2) differentiation abilities assessed by levels of CXCR4  
263 expression at the DE stage and 3) ruling out genetic abnormalities by karyotyping or copy  
264 counting approaches [18]. We noted that PSCs must be adapted to single-cell culture to obtain  
265 a homogeneous cell seeding. When we tried to plate non-adapted cells as large clumps or at  
266 high cell density, cell death was reduced, but differentiation was hampered (figure 2E). This  
267 could be explained by sustained expression of pluripotency transcription factors within the  
268 clumps and/or by altered YAP/TAZ signalling activity. DE and vAFE cell enrichments  
269 (assessed by CXCR4 and NKX2.1 expression) achieved at least in 80% of cells at the relevant  
270 step were good predictors of the final success of the differentiation process. Based on the  
271 work by Matsuno et al [13], we found that APS induction by activation of the activin A/nodal  
272 and WNT pathways for 24h, followed by two additional days of activin A activity and TGF $\beta$   
273 pathway inhibition for DE induction , without addition of other cytokines or small molecules  
274 during vAFE stage, was the most effective strategy. Both SOX2 and SOX9 were observed at

275 the vAFE stage with double positive cells. These bipotent cells were only found in human in  
276 the literature and this increased our confidence in the model as it fits with the progenitor  
277 patterning [19]. Another key point was the use of the PneumaCult differentiation medium.  
278 This proprietary medium, the composition of which is not disclosed, efficiently promotes the  
279 differentiation of primary cells obtained from bronchial biopsies. While we cannot exclude  
280 that this medium might contain a NOTCH pathway inhibitor, we nonetheless added DAPT to  
281 our differentiation protocol. NOTCH signalling inhibition promotes the differentiation into  
282 multi-ciliated cell at the expenses of club cells [25]. This protocol generated epithelia  
283 containing double positive CCSP<sup>+</sup>/MUC5AC<sup>+</sup> cells, single CCSP<sup>+</sup>/MUC5AC<sup>-</sup> and CCSP<sup>-</sup>  
284 /MUC5AC<sup>+</sup> positive cells but largely predominated by basal and ciliated cells. Interestingly,  
285 rare cells such as chromogranin A-expressing neuroendocrine cells and tuft cells were found  
286 in our model. Altogether, these features suggest that the generated epithelia reproduced many  
287 features of a fully differentiated bronchiolar epithelium [26]. The physiological relevance of  
288 the model was reinforced by similar to *in vivo* plugs of mucus evidenced both by Alcian blue  
289 and PAS staining, the formation of vortexes of mucociliary clearance, cilia length and CBF  
290 matching with physiological data.

291 Besides its reproducibility and simplicity, our protocol provides a 2D bronchial epithelium,  
292 unlike other methods that lead to 3D ciliated organoids [8,10,11]. To the best of our  
293 knowledge, these three COPD hiPSC lines are the first described in the literature whereas  
294 difficulties could be expected given the relative circulating CD34 deficiency previously  
295 reported [27]. Moreover, functional, and genetically stable one iALI derived from a COPD  
296 patient could be kept consistently differentiated for nearly 400 days at the time of writing. As  
297 expected for a disease with multifactorial genetic susceptibility to environmental triggers (e.g.  
298 cigarette smoke), the COPD hiPSC lines used here did not show any obvious differentiation  
299 specificities, but more work is needed.

300 In conclusion, we describe here an easy and reliable method to drive PSC differentiation into  
301 2D multicellular bronchial epithelium. This method is highly reproducible, efficient, does not  
302 require a cell sorting step and is achievable from samples of patients with pulmonary  
303 polygenic diseases or monogenic diseases.

304

## 305 **Materials and Methods**

### 306 **Clinical characteristics of reprogrammed and differentiated cells.**

307 Patients included were defined as severe, with early-onset COPD as FEV1/FVC less than 0.70  
308 and FEV1 percent predicted less than 50% on postbronchodilator spirometry in subjects less  
309 than 55 years of age. Normal donors and patients with primary ciliary dyskinesia (PCD) were  
310 recruited in the framework of the CILIPS project. More detailed clinical data are **available**  
311 **online (Supplemental Figure 1, supplemental Tables 1 & 2).**

312

### 313 **Human ESC and iPSC generation and maintenance**

314 The hiPSC lines PCD02.30 (UHOMi001-A) [16], HY03 (UHOMi002-A), iCOPD2  
315 (UHOMi003-A), iCOPD8 (UHOMi004-A) and iCOPD9 (UHOMi005-A) were  
316 reprogrammed using the CytoTune®-iPS 2.0 Sendai Reprogramming Kit (Thermo Fisher  
317 Scientific, cat.no A16517), according to the manufacturer's instructions (unpublished results).  
318 Emerging hiPSC clones were mechanically selected and clonally expanded using mechanical  
319 passaging at early passages (<10 passages). At least three clones for each patient were  
320 maintained and their genetic stability was confirmed (Supplemental figure 2). Pluripotency  
321 was confirmed by alkaline phosphatase activity staining, SSEA3/4 and TRA1-60 cell surface  
322 expression by flow cytometry as previously published [16]. The human ESC line HD291 was



323 derived in our laboratory [17]. The RSP4 and 131007 iPSC lines were derived by the Safe IPS  
324 platform (Montpellier, France) using retroviruses and Sendai vectors, respectively. PSC lines  
325 were maintained in undifferentiated state in feeder-free conditions on growth factor-reduced  
326 Geltrex (Thermo Fisher Scientific) in E8 medium (Thermo Fisher Scientific). Cells were  
327 cultured in 35-mm dishes at 37°C and were dissociated mechanically (under an optical  
328 microscope) or into single cells at 90% of confluence (every 4-5 days). Single-cell passaging  
329 was performed by adding the Versene solution (Thermo Fisher) at 37°C for 5 min and then  
330 seeding at 1:10 to 1:20 ratio with addition of 10µM of the ROCK inhibitor Y-27632 (Tocris).  
331 The E8 maintenance medium was changed every day.

332

### 333 **PSC differentiation**

334 Differentiation was carried out as described in figure 2A, using reagents at the concentrations  
335 listed in supplemental tables 2 and 3. Cells were plated at high-density (one 35mm dish for  
336 two Transwell inserts) on Transwell inserts coated with Geltrex. During the differentiation  
337 process, medium was changed every day. Cells were differentiated under hypoxia condition  
338 (5% O<sub>2</sub>, 37°C).

### 339 **Statistical analysis**

340 Data are presented as means and standard deviations (s.d. or S.E.M), and graphs were  
341 generated with GraphPad (Prism, v 6.01). All shown data are from experiments repeated at  
342 least three time. P <0.05 indicated significant differences between groups.

343

344

### 345 **Figures**

346 **Figure 1: Workflow of the study protocol: from iPSC generation to iPSC-derived airway**  
347 **epithelium.**

348 Left panel: recovery of cell source Day 0 to Day 10. Peripheral blood mononuclear cells  
349 (PBMC) (a) were  
350 isolated from whole blood sample from healthy and COPD patients. CD34+ subpopulation (b)  
351 was amplified into erythroid progenitor cell (EPC). Fibroblasts were isolated from a skin  
352 biopsy of a PCD patient and amplified *in vitro*. Middle panel: Cell reprogramming step Day  
353 11 to 40. EPC or fibroblast were transduced using Sendai virus constructs containing Oct3/4,  
354 Sox2, Klf4 and c-Myc. Induced pluripotent cell (IPS) colony were visible at Day 40 (c). Right  
355 panel: iPSC differentiation into airway epithelium, from day 41 to Day 100+ (d).  
356 COPD: chronic obstructive disease; PCD: primary ciliary dyskinesia, EPC: erythroid  
357 progenitor cell.

358 **Figure 2. Adaptation to single-cell culture is required before starting differentiation**

359 (A) Schematic representation of the differentiation protocol. (B) Left: Confluent hiPSC  
360 colony culture passaged in mechanical clumps. Middle: Non-adapted hiPSC cells (<5 single-  
361 cell passages) undergo massive cell death. Right: Adapted cells after serial single-cell  
362 passages. APL: Alkaline Phosphatase staining on hiPSC that were plated at low density and  
363 grown for one week. Hy03 cell line. (C) Left panels: Non-adapted hiPSCs show massive cell  
364 apoptosis at the APS/DE stage. Right panels: Confluent cell layer at the APS/DE step when  
365 using adapted cells, Hy03 cell line. (D) Design of the experiments to optimize the interval  
366 between hiPSC plating and APS induction (two plating densities: 35 000 and 70 000 cells per  
367 cm<sup>2</sup>). (E) Results of the optimization experiments based on CXCR4 expression (DE marker).  
368 (F) Too low (35K.cm<sup>-2</sup>) and too high (140K.cm<sup>-2</sup>) cell plating density lead to massive cell

369 death or incomplete OCT4 inhibition, respectively. Optimal cell density (here 70K.cm<sup>2</sup>)  
370 induces strong OCT4 inhibition and high SOX17 expression (iCODP8 cell line).

371 **Figure 3. Differentiation of induced pluripotent stem cells into bronchial airway**  
372 **epithelium**

373 (A) Morphological changes during the different differentiation steps. Day 0: hiPSC cells  
374 plated as single cells. Day 1: Anterior primitive streak. Day 2-3: Definitive endoderm. Day 4,  
375 6 and 8: Anterior foregut endoderm; red arrows: bud-like structures. Day 9: Lung progenitors  
376 after mechanical clump passage and plating on Transwell inserts. Day 14 (polarization day):  
377 Epithelial layer. Day 42+: Multi-ciliated bronchial epithelial layer. Scale bar 200µm. (B)  
378 Quality of DE induction based on CXCR4 expression by flow cytometry analysis in the  
379 different PSC lines used (n=8) (C) Time course of DE induction (n=3, HY03 hiPSC line). (D)  
380 Immunofluorescence analysis of OCT4, SOX17 and FOXA2 expression in DE cultures  
381 derived from PCD cell line. (E) Quantification of SOX17 and FOXA2 positive cells as  
382 percentage of all DAPI-positive cells, (n=3, PCD02.30 cell line).

383

384 **Figure 4. Anterior foregut endoderm characterization**

385 (A) Percentage of NKX2.1-positive cells after vAFE induction in the indicated cell lines.  
386 Undifferentiated hiPSCs: negative control. (B) Expression of NKX2.1, a ventral anterior  
387 foregut endoderm marker, assessed by immunofluorescence (Hy03 cell line). (C) Kinetics of  
388 NKX2.1 expression (n=3, HY03 cell line). (D) Expression of SOX2 and SOX9. Note, the  
389 presence of SOX2/SOX9 double-positive cells. (E) Analysis of the pluripotency markers  
390 NANOG and OCT4 in hiPSCs (top), definitive endoderm (DE; middle) and ventral anterior  
391 foregut endoderm stage (vAFE; bottom) (Hy03 cell line). (F) Model of hiPSC differentiation

392 into the three embryonic layers, emphasizing that NKX2.1 expression is shared by bronchial,  
393 neuroectodermal and thyroid progenitors, the two later being a potential source of cell  
394 contamination in NKX2.1 positive cells during iPSC differentiation into lung progenitors. (G)  
395 Quantitative PCR analysis to assess contamination by thyroid gland (TG), liver (AFP), brain  
396 (PAX6) or intestine (CDX2) and confirm progressive extinction of pluripotency marker  
397 OCT4 and NANOG. Positive controls: brain mRNA, gut mRNA, thyroid mRNA, HepG2  
398 (human liver cancer cell line) mRNA. IPS used for pluripotency control. Scale bar = 20µm.

399

#### 400 **Figure 5. hiPSC-derived bronchial airway epithelium at 45 days of differentiation**

##### 401 **(iALI)**

402 (A) Epithelial cells: Optical microscopy image (left panel), and E-cadherin expression (right  
403 panel). iCOPD9 cell line (B, C) Basal cells: TP63 and KRT5 expression, Hy03 and iCOPD9  
404 cell line, respectively. (D) Multi-ciliated cells: expression of the terminal differentiation  
405 marker TUBIV, iCOPD2 cell line. (E) Rare clusters of CHGA-positive neuroendocrine cells,  
406 iCOPD9 cell line. (F) Muc5AC-positive goblet cells, iCOPD9 cell line. (G) Immunostaining  
407 of CCSP+ club cells and MUC5AC+ goblet cells in cultures grown without DAPT. Note the  
408 presence of CCSP/MUC5AC double-positive cells, iCOPD9 cell line. (H) Dot blot analysis to  
409 detect the presence of MUC5AC in supernatants of one iALI bronchial epithelium culture  
410 (derived from Hy03 cell line) from Day 28 to Day 44. (I) Alcian blue staining and Periodic  
411 acid Schiff (PAS), labelling mucus in supernatants of iCOPD9 culture. (J) CCSP  
412 quantification at Day 45 in supernatants from iALI bronchial epithelium cultures derived from  
413 the HY03, iCOPD9, and iCOPD8 hiPSC lines (K) Quantitative PCR analysis to assess the  
414 expression of Foxj1 (ciliated cells), SFTPB (alveolar cells), CHGA (neuroendocrine cells) and

415 Muc5AC (goblet cells). ALI airway epithelium control was obtained from a bronchial biopsy  
416 cultured in Lonza BEGM culture medium Panel Scale bar: 20 $\mu$ m

417

418 **Figure 6. Multi-ciliated bronchial epithelium and cilia characterization at 45 days of**  
419 **differentiation**

420 (A) Confocal microscopy analysis of TUBIV (ciliated cell marker) and KRT5 (basal cell  
421 marker) expression, iCOPD2 cell line. (B) Optical microscopy images of ciliated cells used for  
422 cilia length determination, Hy03 cell line. (C) Top left: Scanning electron microscopy (SEM)  
423 image of ciliated cells used for cilia length determination. iCOPD9 cell line. Scale bar 10 $\mu$ m.  
424 Right panels: Cilia cross sections by transmission electron microscopy. (D) Determination of  
425 cilia lengths by SEM and optical microscopy according to cell lines. Cilia length  
426 measurement was performed respectively on primary cells in ALI, n=91 by SEM and n=45 by  
427 O.M , bronchial brushing from COPD patients n=141 by O.M , iCOPD2 n=428 by SEM,  
428 iCOPD8 n= 98 by SEM and n=120 by O.M, HY03 n=51 by O.M, iCOPD9 n=66 by O.M. (E)  
429 Top: Ciliary beating frequency map from a movie (500 frames per second), iCOPD2 cell line  
430 Scale bar 50 $\mu$ m. Bottom left: Mean ciliary beating frequency distribution. Bottom right:  
431 vectors representing the orientation and celerity of the vortex flow generated by ciliary  
432 beating, iCOPD8 cell line Scale bar 20 $\mu$ m. Hz=hertz

433

434

435 **Supplemental data**

436

437 **Supplemental Table 1: Baseline characteristics of COPD patients**

438 COPD = chronic obstructive pulmonary disease. FVC = forced vital capacity. FEV1 = forced  
439 expiratory volume, RV= residual volume. GORD = gastro-oesophageal reflux disease, PaO<sub>2</sub> =  
440 partial pressure of oxygen. WA ratio= Wall Area ratio. Wall thickness was expressed as a  
441 ratio of the wall thickness to the total airway diameter (WA ratio) and mean value was  
442 calculated for each patient from all the bronchi measured. In this study, quantitatively  
443 assessment of emphysema was assessed by the percentage of low attenuation area (LAA%)  
444 divided by lung or lobe volume(s). A threshold of - 950 Hounsfield Units (HU) was used.

445 \*: other substance abuse included cannabis, intravenous heroin, Subutex misuse (patient  
446 COPD2), and cannabis (patient COPD8).

447 \*\*: Pulmonary hypertension was diagnosed on transthoracic echocardiography; if abnormal,  
448 right heart catheterization was performed.

449

450 **Supplemental Table 2: Baseline characteristics of PCD patient**

451 PCD: Primary ciliary dyskinesia. FVC=forced vital capacity. FEV1=forced expiratory  
452 volume.

453

454 **Supplemental Table 3: Media composition by culture period**

455

456 **Supplemental Table 4: Molecules and used concentration**

457

458 **Supplemental Table 5: List of reagents and consumables**

459

460 **Supplemental Table 6: List and sequences of the primers used for RT-qPCR**

461

462

463 **Supplemental figure 1. Clinical characteristics of patients.**

464 (A) COPD patients. Left panel: high-resolution inspiratory CT images showing apical  
465 centrilobular, para-septal severe emphysema (column apex). In patients COPD2 and COPD8,  
466 bronchiectasis and increased airway wall thickness could also be observed (column base).  
467 Right panel: rate of change in forced expiratory volume in 1 second (FEV1) over the years  
468 since diagnosis. Loss of lung function (% change from baseline) seems more accelerated in  
469 COPD patients in this study, around 20 to 30% during the follow up. The mean rate of FEV1  
470 decline in iCOPD2, iCOPD8 and iCOPD9 was respectively 40 mL/year, 83 mL/year, 65  
471 mL/year. (B) PCD patient. Top-left panel: segregation analysis from the studied family  
472 demonstrating recessive inheritance of the CCDC40 mutations. Proband was compound  
473 heterozygous for Coiled-Coil Domain Containing 40 (CCDC40) gene, carrying two  
474 mutations, [c.1116\_1117delCT (Exon 7) and c.3180+\_1G>\_A (Intron 19)]. The parents  
475 were found to be carriers, segregation analysis showed that c.1116\_1117delCT (Exon 7)  
476 mutation was inherited from the father and that the mutation c.3180+\_1G>\_A (Intron 19)  
477 was inherited from the mother. Her affected sibling was also carrying both CCDC40  
478 mutations. No consanguinity has been reported in this family. Top-right panel: clinical details  
479 for the family are shown in the table. Proband exhibited severe rhinosinusitis affection,  
480 exacerbations due to bronchiectasis disease and infertility. Her sibling, died prematurely due

481 to congenital heart disease with heterotaxia, comprising transposition of the great arteries  
482 (TGA), single ventricle, pulmonary stenosis and dextrocardia. He also suffered from airway  
483 ciliary dysfunction. Lower panel: lung computer tomography (CT) scan of the PCD patient.  
484 Bronchiectasis can be identified on inspiratory CT images (a), present mainly in the middle  
485 lobe (b). There were thickening of the airway wall (c), central mucous plugs (d) and some  
486 area of lung consolidation (e). Small airway disease was illustrated by impaction in  
487 bronchioles and small nodules (f); however, expiratory CT image did not demonstrate areas of  
488 air trapping (data not shown).

489

490 **Supplemental Figure 2: Genetic integrity of the hiPSC lines used for differentiation into**  
491 **iALI bronchial epithelia**

492 (A) Genomic integrity evaluation of the hiPSC lines using the iCS-digital test [18]. Copy  
493 number variation analysis using droplet digital PCR and DNA extracted from the different  
494 hiPSC lines in culture (iCOPD8, iCOPD9, iCOPD2, PCD02.30 and HY03). All the hiPSC lines  
495 remained euploids, except iCOPD2 (clone A13) that displayed a copy number gain on  
496 chromosome 20q at mechanical passage 70 and clumps passage 3 (M70CL3) and was  
497 therefore later on discarded. Error bars indicate the Poisson distribution (95% confidence  
498 intervals).

499 (B) Same analysis, using the iCS-digital Aneuploidy test to screen the 23 chromosomes in one  
500 iALI bronchial epithelium culture that was maintained for twelve months in culture.

501

502 **Supplemental Figure 3 NKX2.1 and CXCR4 FACS gating strategy**

503 (A) Gating strategy for the isolation of CXCR4 positive cells.



504 Flow cytometry gating strategy to viable CXCR4 cell subsets at the Definitive endoderm  
505 stage. Staining of single-cell solutions using isotype and CXCR4 conjugated antibodies and  
506 analysis by flow cytometry. (A-C) Gating strategy to exclude doublet (B) and isolate real  
507 single-cell unit (C). Among single cells, live cells were selected on absence of Zombie violet  
508 staining (D). (E) CXCR4 expression of cells compared to isotype control on PE staining (B)  
509 Gating strategy for the isolation of NKX2.1 positive cells.

510 (A) Flow cytometry gating strategy to viable NKX2.1 cell subset at the Anterior Foregut  
511 Endoderm stage. Staining of single-cell solutions using different unconjugated antibody and  
512 analysis by flow cytometry. (A-C) Gating strategy to exclude doublet and isolate real single-  
513 cell unit. (D) Among single cells, live cells were selected on absence of Zombie violet  
514 staining (E) NKX2.1 expression of cells compared to isotype control on Alexa 488 staining.

515

516 **Supplemental Figure 4. Characterization of v-AFE progenitors SOX9 expression and**  
517 **time course expression of NKX2.1 during v-AFE induction.**

518 (A) Kinetic expression of NKX2.1 by immunostaining during v-AFE induction, in Hy03 cell  
519 line. Note increasing expression during the time course. Scale bar: 20µm.

520 (B) Immunostaining of Hy03 -derived v-AFE cells for SOX9 (green) nuclear proteins. during  
521 v-AFE stage. Scale bars: 20 µm.

522 (C) Immunolabelling of Hy03 cell line v-AFE stage for NKX2.1 (orange) and ki67 (green).  
523 Nuclei counterstained with DAPI.

524 (D) Immunofluorescence of v-aFE stage showing no contamination by AFP positive (liver)  
525 cells (PCD02.30 cell line). These results were available for all the others iPSC cell lines (data  
526 not shown). HepG2 hepatoma cell line was used as positive control, characterized by AFP  
527 expression (red). Scale bar 50µm.

528

529 **Supplemental Figure 5: iALI**

530 (A) Electron microscopy of hiPSC derived airway epithelium grown at an air–liquid interface  
531 (iALI) after 45 days of differentiation (iCOPD2 and iCOPD9 cell lines).

532 Column 1: Transmission Electron Microscopy of mature epithelium. Top: presence of two  
533 contiguous ciliated cells. Red arrows head show epithelial features highlighted by tight  
534 junction and desmosomes. Bottom: at the apical pole, red stars parts of cilia section.

535 Column 2: Scanning electron microscopy of epithelial layer. Top: goblet cell layer; middle:  
536 red arrows indicate cilia of multiciliated cell and orange ones indicate mucus globules.  
537 Bottom: red asterisks show microvilli. Orange arrow indicate cluster of mucus. Red arrow  
538 exhibit multiciliated cells. Scale bar is 10  $\mu\text{m}$ .

539 (B) Tight-junction integrity during the course of culturing was assessed by measuring the  
540 TEER. At least three inserts were analysed at each point of the time course and the data  
541 represents the mean  $\pm$  SD (iCOPD9 cell line).

542 (C) Colocalization of two colours confocal image of CCSP/MUC5AC. MUC5AC protein  
543 (red) colocalizes with CCSP protein (green) at day 14 of ALI. Orthogonal views (XY, XZ,  
544 YZ) illustrating colocalization of CCSP and MUC5AC. Colocalization is visible as a yellow  
545 colour. iCDOP9 cell line. Scale bar is 20  $\mu\text{m}$ .

546 (D) Multiciliated cell characterization using DNAH5 and TUBIV antibody. DNAH5  
547 immunolabelling exhibit an axoneme in iCOPD9 cell line (left panel). TUBIV  
548 immunofluorescence show only a cilia staining (middle). Merge of DNAH5 and TUBIV  
549 staining (right panel), iCOPD9 cell line. Scale bar is 10  $\mu\text{m}$ .

550

551 **Supplemental Movie 1: iALI bronchial epithelium obtained from the iCOP9 hiPSC cell**  
552 **line (X20)**

553 Cilia beating was clearly visible on this video from iCOPD9 at Day 45. Acquisition was  
554 performed with inverted microscopy during cell culture routine check-up. The video  
555 represents cells that have been dissociated, before passaging cells into another coated  
556 Transwell. Dissociation was performed using Trypsin 10 minutes at 37°.

557

558 **Supplemental Movie 2: iALI bronchial epithelium obtained from the iCOPD8 hiPSC**  
559 **cell line (X40)**

560 This acquisition was used for biophysics analysis i.e. Ciliary Beat Frequency (CBF).  
561 The video was recorded at 500 frames per second. This video includes 1500 frames.

562 **Supplemental Movie 3: iALI bronchial epithelium obtained from the iCOPD9 hiPSC**  
563 **cell line and with live immunofluorescence for TubIV**

564 **Supplemental Information: Supplemental Methods and Supplemental Clinical data**

565

566 **References**

- 567 1. GBD CODC (2018) Global, regional, and national age-sex-specific mortality for 282  
568 causes of death in 195 countries and territories, 1980-2017: a systematic analysis for the  
569 Global Burden of Disease Study 2017. *Lancet* 392: 1736-1788.
- 570 2. Ahmed E, Sansac C, Assou S, Gras D, Petit A, Vachier I et al. (2018) Lung  
571 development, regeneration and plasticity: From disease physiopathology to drug design  
572 using induced pluripotent stem cells. *Pharmacol Ther* 183: 58-77.
- 573 3. Green MD, Chen A, Nostro MC, d'Souza SL, Schaniel C, Lemischka IR et al. (2011)  
574 Generation of anterior foregut endoderm from human embryonic and induced  
575 pluripotent stem cells. *Nat Biotechnol* 29: 267-272.
- 576 4. Wong AP, Bear CE, Chin S, Pasceri P, Thompson TO, Huan L-J et al. (2012) Directed  
577 differentiation of human pluripotent stem cells into mature airway epithelia expressing  
578 functional CFTR protein. *Nature Biotechnology* 30: 876-882.

- 579 5. Mou H, Zhao R, Sherwood R, Ahfeldt T, Lapey A, Wain J et al. (2012) Generation of  
580 Multipotent Lung and Airway Progenitors from Mouse ESCs and Patient-Specific  
581 Cystic Fibrosis iPSCs. *Cell Stem Cell* 10: 385-397.
- 582 6. Huang SX, Islam MN, O'Neill J, Hu Z, Yang YG, Chen YW et al. (2014) Efficient  
583 generation of lung and airway epithelial cells from human pluripotent stem cells. *Nat*  
584 *Biotechnol* 32: 84-91.
- 585 7. Firth AL, Dargitz CT, Qualls SJ, Menon T, Wright R, Singer O et al. (2014) Generation  
586 of multiciliated cells in functional airway epithelia from human induced pluripotent  
587 stem cells. *Proceedings of the National Academy of Sciences of the United States of*  
588 *America*
- 589 8. Dye BR, Hill DR, Ferguson MA, Tsai YH, Nagy MS, Dyal R et al. (2015) In vitro  
590 generation of human pluripotent stem cell derived lung organoids. *Elife* 4: e05098.
- 591 9. Konishi S, Gotoh S, Tateishi K, Yamamoto Y, Korogi Y, Nagasaki T et al. (2016)  
592 Directed Induction of Functional Multi-ciliated Cells in Proximal Airway Epithelial  
593 Spheroids from Human Pluripotent Stem Cells. *Stem Cell Reports* 6: 18-25.
- 594 10. Chen Y-W, Huang SX, de Carvalho ALRT, Ho S-H, Islam MN, Volpi S et al. (2017) A  
595 three-dimensional model of human lung development and disease from pluripotent stem  
596 cells. *Nature Cell Biology* 372: 3.
- 597 11. McCauley KB, Hawkins F, Serra M, Thomas DC, Jacob A, Kotton DN (2017) Efficient  
598 Derivation of Functional Human Airway Epithelium from Pluripotent Stem Cells via  
599 Temporal Regulation of Wnt Signaling. *Cell Stem Cell*
- 600 12. Morrisey EE, Hogan BLM (2010) Preparing for the first breath: genetic and cellular  
601 mechanisms in lung development. *Developmental Cell* 18: 8-23.
- 602 13. Matsuno K, Mae SI, Okada C, Nakamura M, Watanabe A, Toyoda T et al. (2016)  
603 Redefining definitive endoderm subtypes by robust induction of human induced  
604 pluripotent stem cells. *Differentiation* 92: 281-290.
- 605 14. Hawkins F, Kramer P, Jacob A, Driver I, Thomas DC, McCauley KB et al. (2017)  
606 Prospective isolation of NKX2-1-expressing human lung progenitors derived from  
607 pluripotent stem cells. *J Clin Invest* 127: 2277-2294.
- 608 15. Gomperts BN (2014) Induction of multiciliated cells from induced pluripotent stem  
609 cells. *Proc Natl Acad Sci U S A* 111: 6120-6121.
- 610 16. Ahmed E, Sansac C, Fieldes M, Bergougnoux A, Bourguignon C, Mianné J et al. (2018)  
611 Generation of the induced pluripotent stem cell line UHOMi001-A from a patient with  
612 mutations in *CCDC40* gene causing Primary Ciliary Dyskinesia (PCD). *Stem Cell Res*  
613 33: 15-19.
- 614 17. Bai Q, Ramirez JM, Becker F, Pantesco V, Lavabre-Bertrand T, Hovatta O et al. (2015)  
615 Temporal analysis of genome alterations induced by single-cell passaging in human  
616 embryonic stem cells. *Stem Cells Dev* 24: 653-662.
- 617 18. Assou S, Girault N, Plinet M, Bouckenheimer J, Sansac C, Combe M et al. (2020)  
618 Recurrent Genetic Abnormalities in Human Pluripotent Stem Cells: Definition and  
619 Routine Detection in Culture Supernatant by Targeted Droplet Digital PCR. *Stem Cell*  
620 *Reports* 14: 1-8.
- 621 19. Miller AJ, Hill DR, Nagy MS, Aoki Y, Dye BR, Chin AM et al. (2018) In Vitro  
622 Induction and In Vivo Engraftment of Lung Bud Tip Progenitor Cells Derived from  
623 Human Pluripotent Stem Cells. *Stem Cell Reports* 10: 101-119.
- 624 20. Millien G, Beane J, Lenburg M, Tsao PN, Lu J, Spira A et al. (2008) Characterization of  
625 the mid-foregut transcriptome identifies genes regulated during lung bud induction.  
626 *Gene Expr Patterns* 8: 124-139.

- 627 21. Montoro DT, Haber AL, Biton M, Vinarsky V, Lin B, Birket SE et al. (2018) A revised  
628 airway epithelial hierarchy includes CFTR-expressing ionocytes. *Nature*  
629 22. Reid L, Meyrick B, Antony VB, Chang LY, Crapo JD, Reynolds HY (2005) The  
630 mysterious pulmonary brush cell: a cell in search of a function. *Am J Respir Crit Care*  
631 *Med* 172: 136-139.  
632 23. Gibbons IR, Rowe AJ (1965) Dynein: A Protein with Adenosine Triphosphatase  
633 Activity from Cilia. *Science* 149: 424-426.  
634 24. Papon JF, Bassinet L, Cariou-Patron G, Zerah-Lancner F, Vojtek AM, Blanchon S et al.  
635 (2012) Quantitative analysis of ciliary beating in primary ciliary dyskinesia: a pilot  
636 study. *Orphanet J Rare Dis* 7: 78.  
637 25. Lafkas D, Shelton A, Chiu C, de Leon Boenig G, Chen Y, Stawicki SS et al. (2015)  
638 Therapeutic antibodies reveal Notch control of transdifferentiation in the adult lung.  
639 *Nature* 528: 127-131.  
640 26. Okuda K, Chen G, Subramani DB, Wolf M, Gilmore RC, Kato T et al. (2019)  
641 Localization of Secretory Mucins MUC5AC and MUC5B in Normal/Healthy Human  
642 Airways. *Am J Respir Crit Care Med* 199: 715-727.  
643 27. Palange P, Testa U, Huertas A, Calabrò L, Antonucci R, Petrucci E et al. (2006)  
644 Circulating haemopoietic and endothelial progenitor cells are decreased in COPD. *Eur*  
645 *Respir J* 27: 529-541.  
646

#### 647 **Acknowledgements**

648 We are grateful to Pascal Chanez and Delphine Gras for reagents. This work was supported  
649 by the grants FDM20170638083 (FRM) and RF20160501664 (Vaincre la Mucoviscidose),  
650 and by Boehringer Ingelheim. The clinical studies were conducted by DRCI CHU de  
651 Montpellier with protocol numbers UF 9791 and UF 9174.

652 We wish to thank Montpellier Rio Imaging for access to their imaging technological facilities  
653 (<http://www.mri.cnrs.fr/en/>). We thank Elena Hauser for her technical help. We thank Dr  
654 Sebastien Bommart for chest CT scan analyses. We thank iPSC platform for RSP4 and  
655 131 000 iPSCs cell lines.

656

#### 657 **Declaration of interests**

658 AB reports grants, personal fees, non-financial support and other from AstraZeneca; grants,  
659 personal fees, non-financial support and other from Boehringer Ingelheim; grants, personal  
660 fees, non-financial support and other from GlaxoSmithKline; personal fees, non-financial

661 support and other from Novartis; personal fees and non-financial support from Teva; personal  
662 fees, non-financial support and other from Regeneron; personal fees, non-financial support  
663 and other from Chiesi Pharmaceuticals; grants, personal fees, non-financial support and other  
664 from Actelion; personal fees from Gilead; non-financial support and other from Roche; other  
665 from Nuvaira, outside the submitted work. JDV reports personal fees and other from Stem  
666 Genomics; personal fees and other from MedXCell Science; personal fees from Gilead;  
667 personal fees from Celgene, outside the submitted work. In addition, JDV and SA have a  
668 patent EP20150306389 pending. SA reports personal fees and other from Stem Genomics,  
669 outside the submitted work. JPG is employee of Boehringer Ingelheim. EA, MF, CB, JM, AP,  
670 CV, MJ, CC, HB, GM, IV declare no conflict of interest.

671 Author contributions: E.A., M.F., S.A., A.B., and J.D.V designed the study and analyzed data;  
672 E.A., M.F., S.A., C.B., J.M., A.P., C.V., M.J., C.C., H.B. performed the experiments,  
673 collected and analysed data; M.J. and G.M. analysed biophysical data .E.A., M.F., S.A., I.V.,  
674 J.P.G, A.B., and J.D.V wrote the paper. All authors approved the final version prior to  
675 submission. All authors have read, reviewed and approved the final submitted manuscript and  
676 agree to take public responsibility for it.

## 677 **Funding**

678 Supported by grants from the University Hospital of Montpellier (Appel d'offre interne, projet  
679 CILIPS 9174, projet INVECCO), the association "Gueules Cassées" (Grant #17-2015), the  
680 association Vaincre la Mucoviscidose (Grant #RIF20170502048), the Fondation pour la  
681 Recherche Médicale (Grant #FDM20170638083), the Labex Numev (ANR-10-LAB-20) and  
682 Boehringer Ingelheim.

683



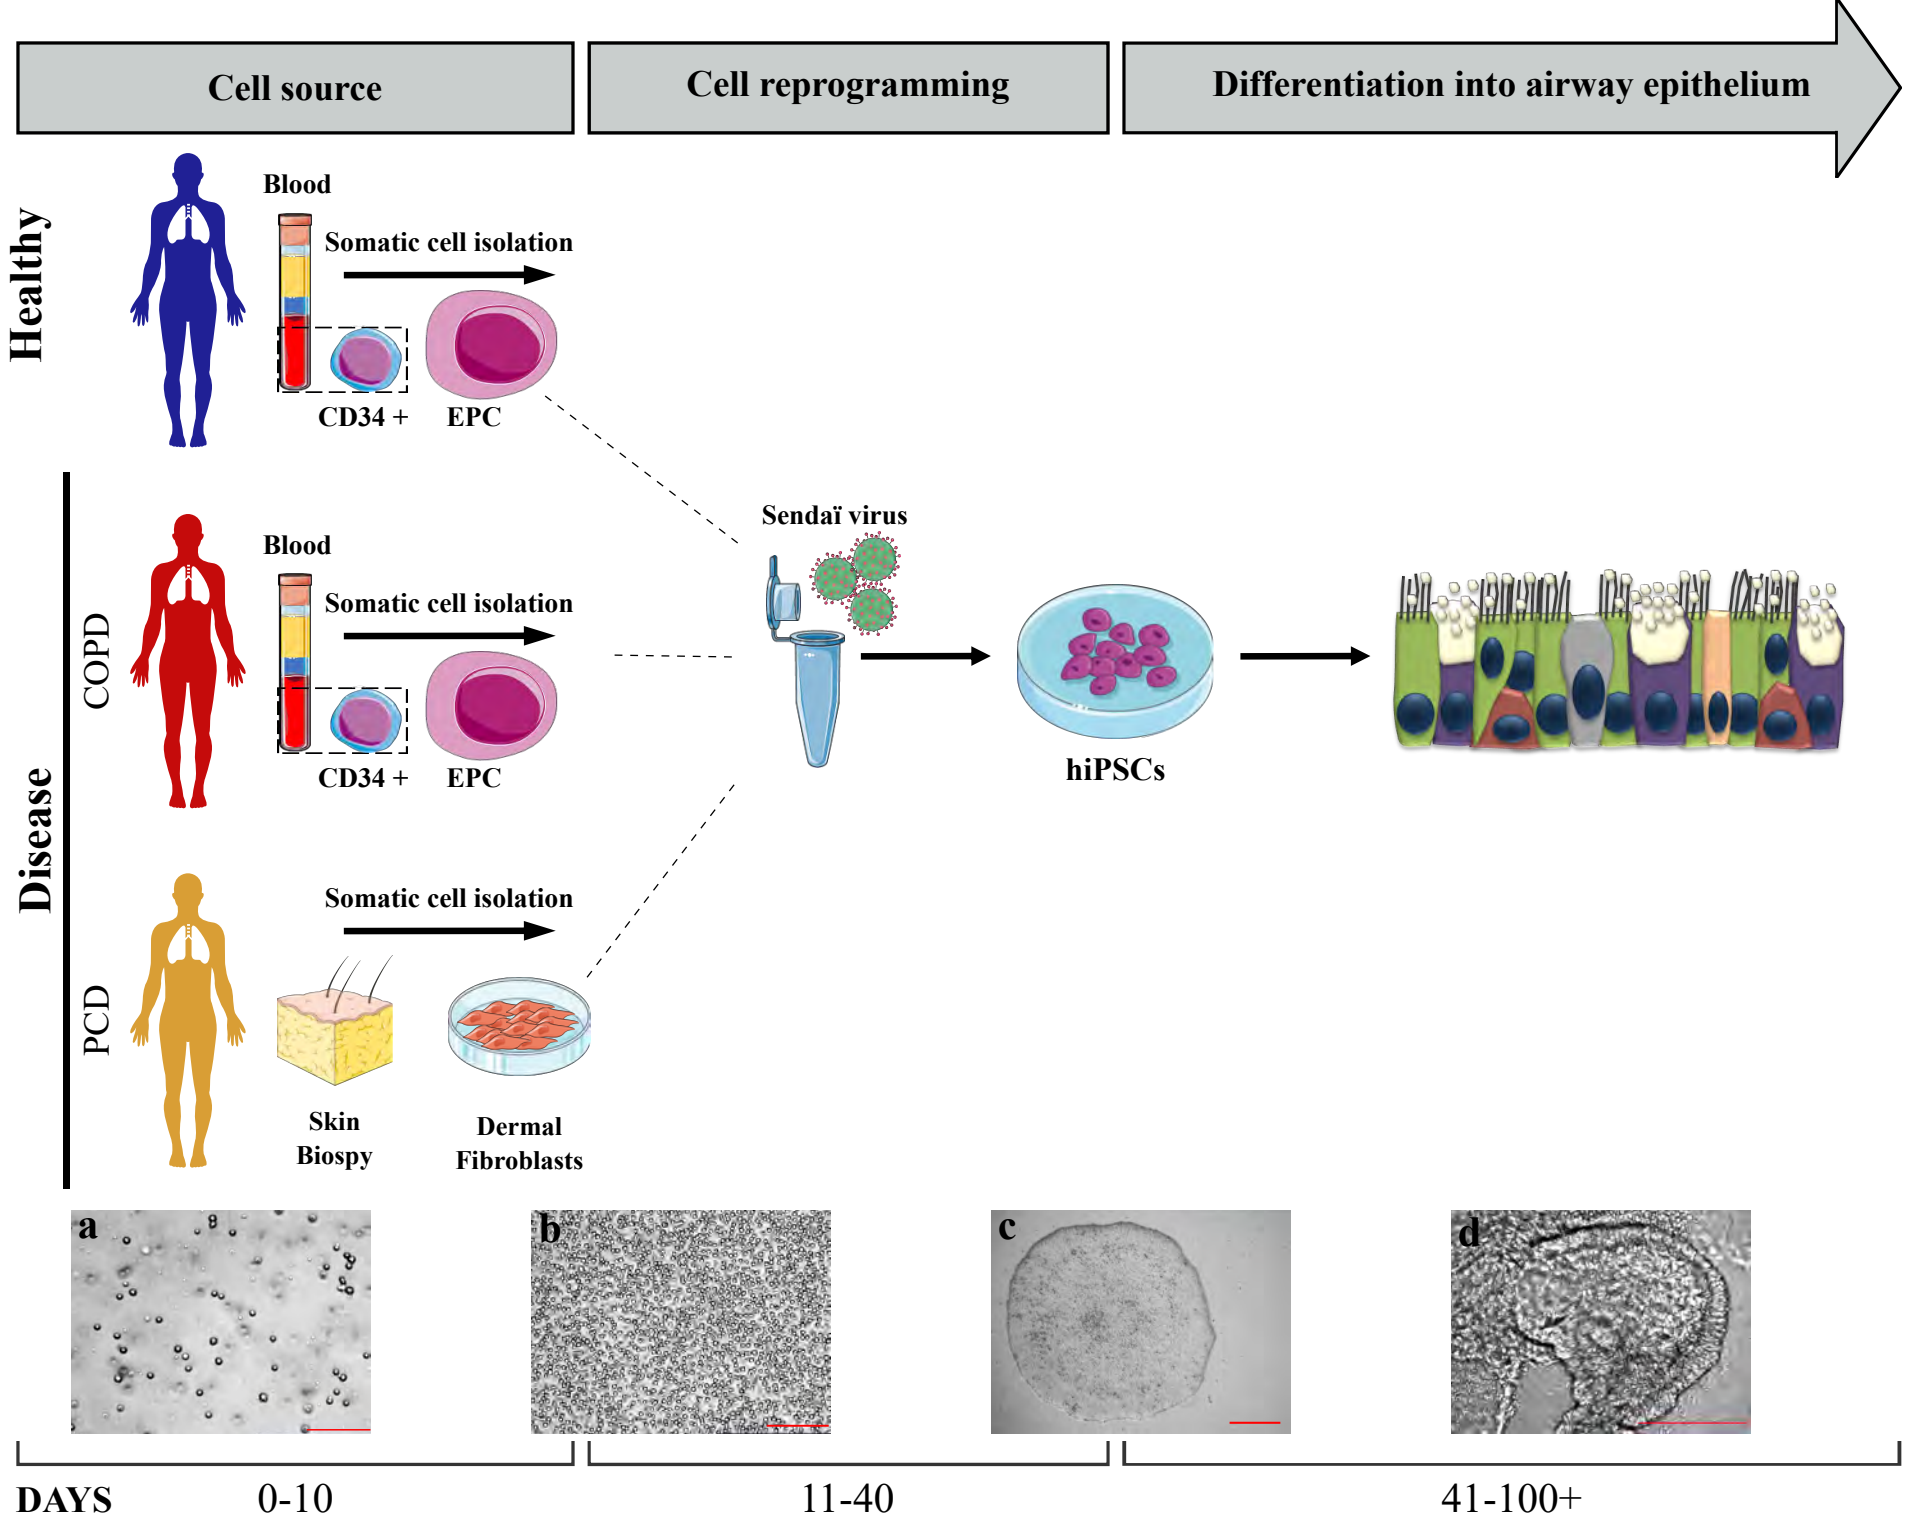

**Figure 1**



# Figure 2

**A** Activin A 100 ng/mL CHIR-99021 3mM Y-27632 10μM Activin A 100 ng/mL LDN-193189 250 nM Y-27632 10μM No Cytokines PneumaCult - Ex Plus medium - ALI medium PneumaCult ALI medium +/- DAPT

bioRxiv preprint doi: <https://doi.org/10.1101/2020.11.29.400358>; this version posted November 29, 2020. The copyright holder for this preprint (which was not certified by peer review) is the author/funder, who has granted bioRxiv a license to display the preprint in perpetuity. It is made available under aCC-BY-ND 4.0 International license.

Day 0 1 2-3 4-8 9-10 : Ex Plus 11-12 : ALI 13-27 : ALI 28-42 : ALI + DAPT

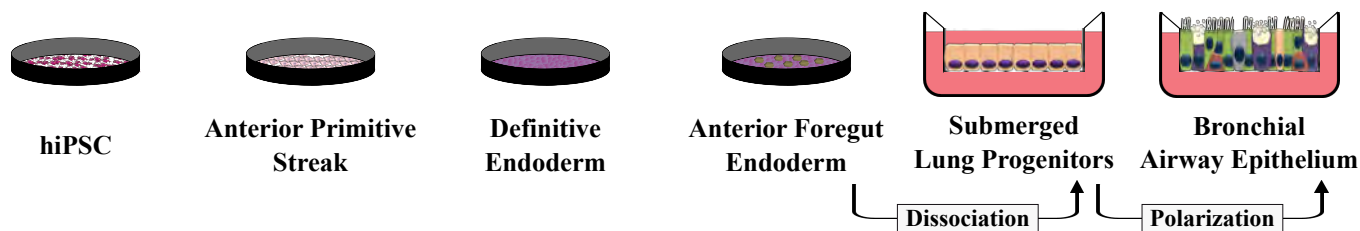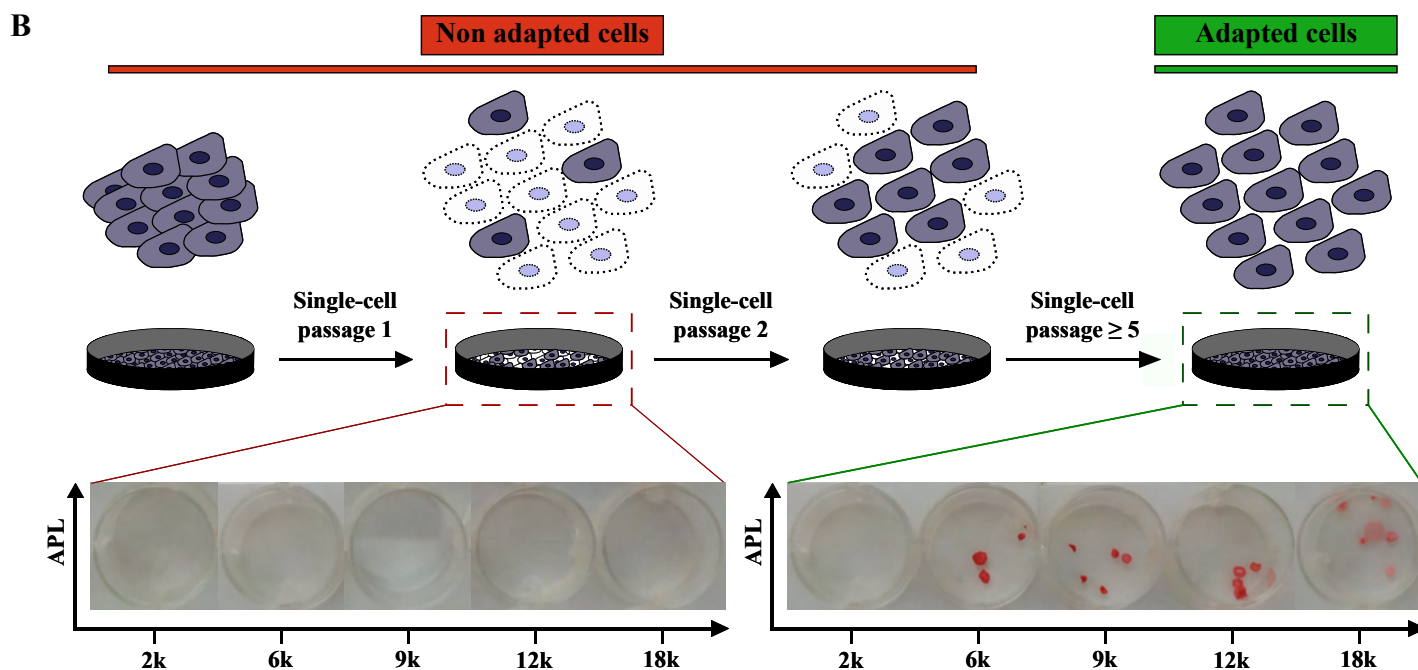

**C** Non adapted hiPSC Adapted hiPSC

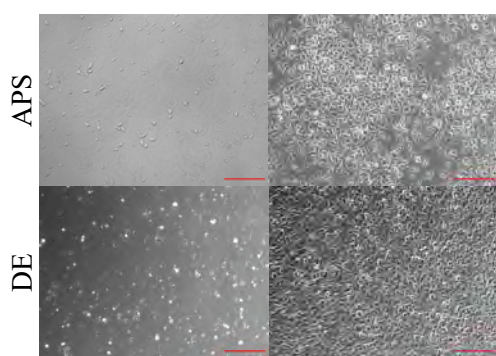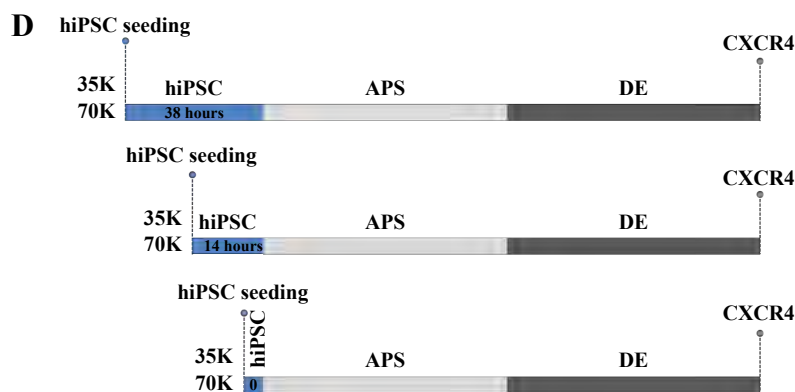

**E** Timing of APS induction after hiPS plating (hours)

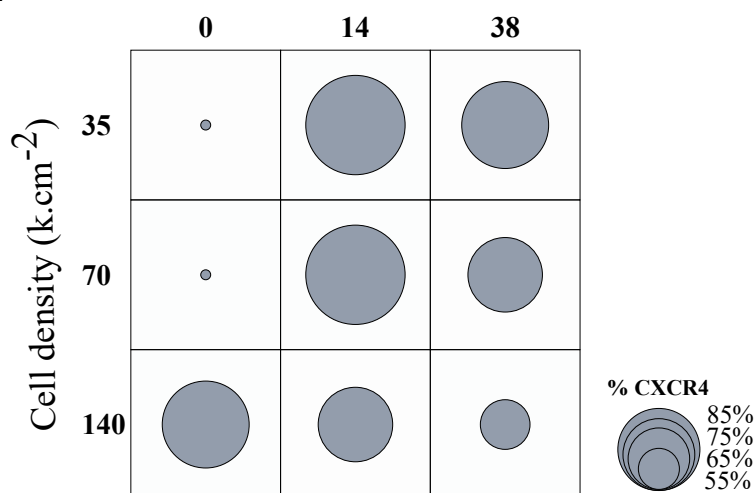

**F** OCT4 SOX17 OCT4 SOX17

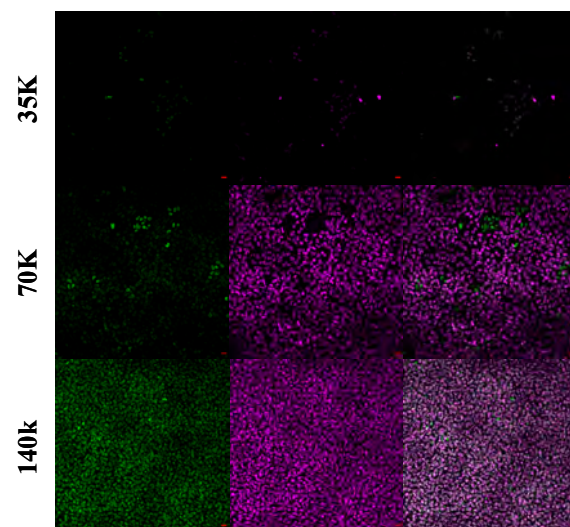

# Figure 3

A

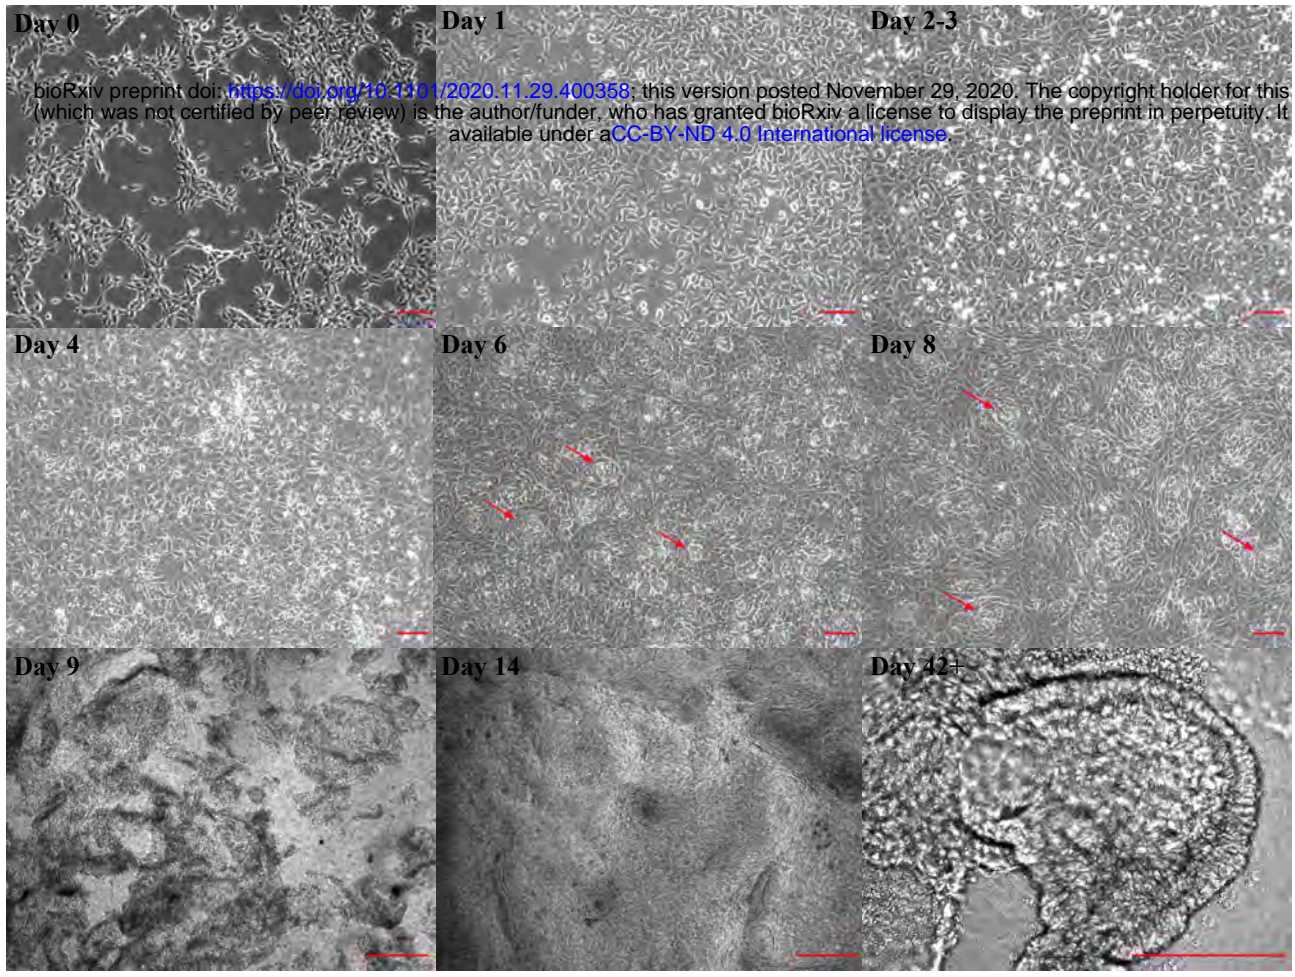

B

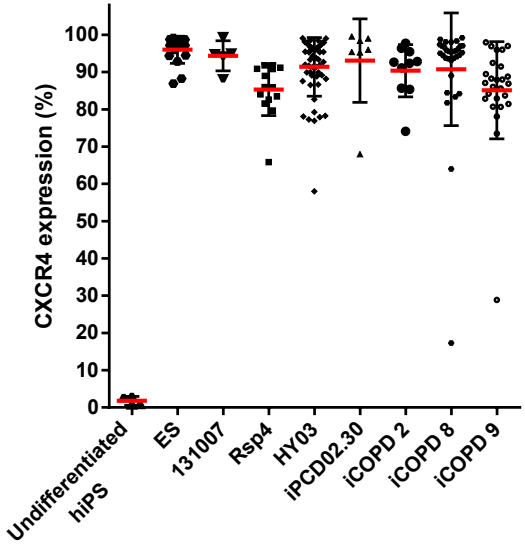

C

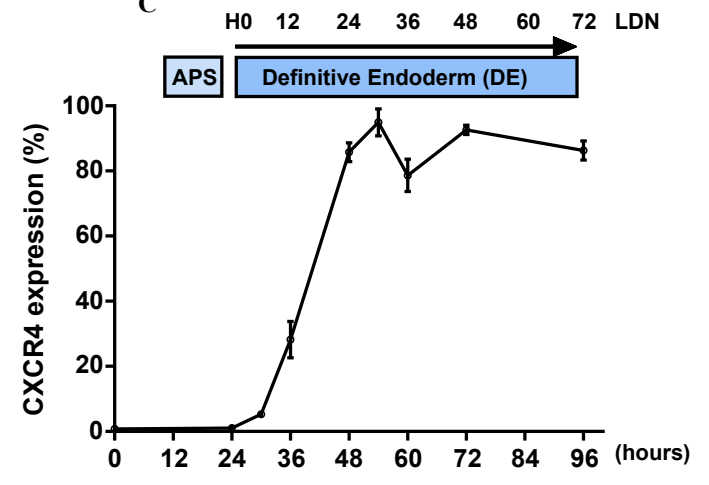

D

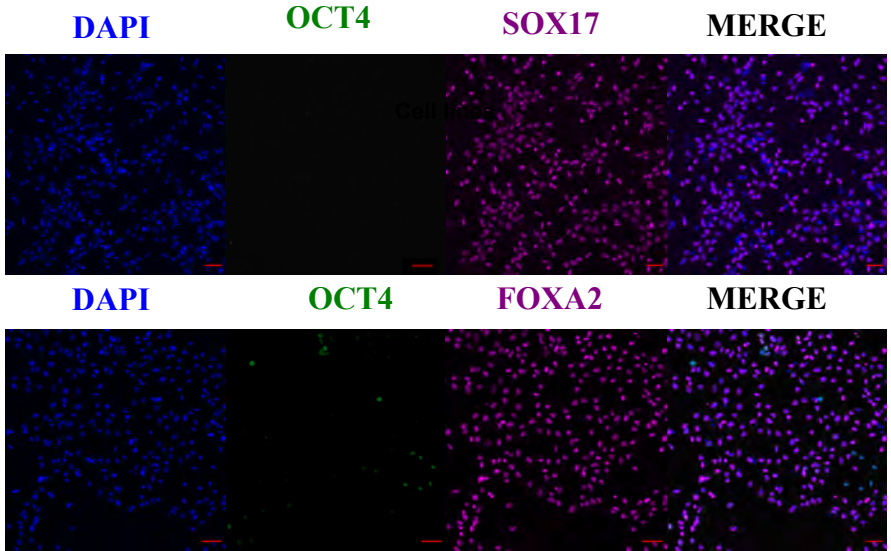

E

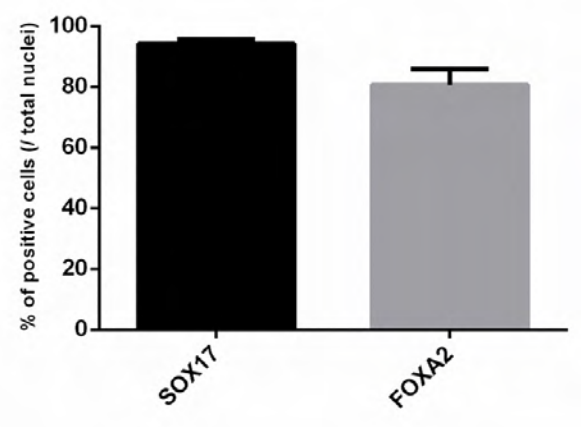

# Figure 4

A

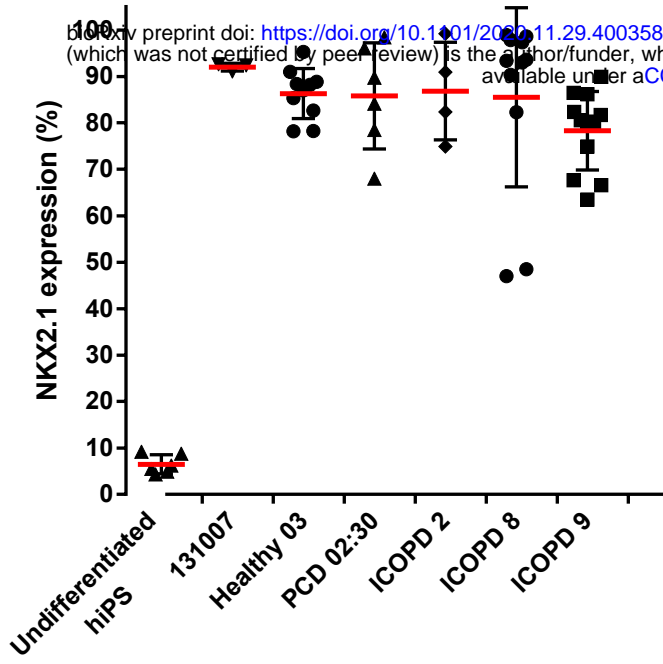

B

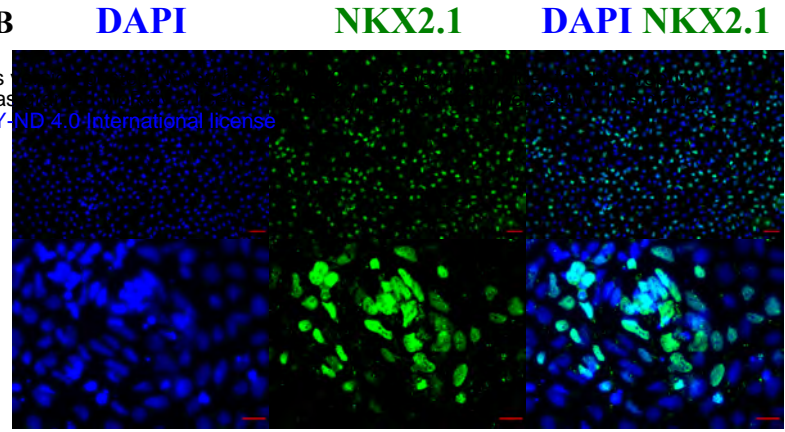

D

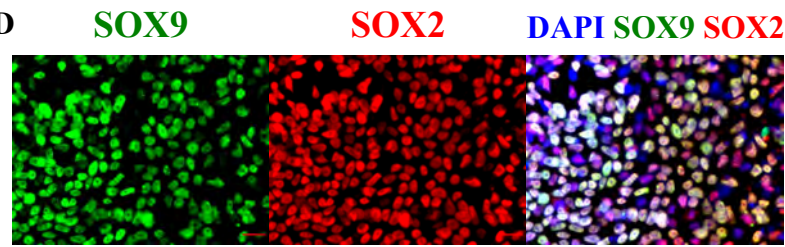

C

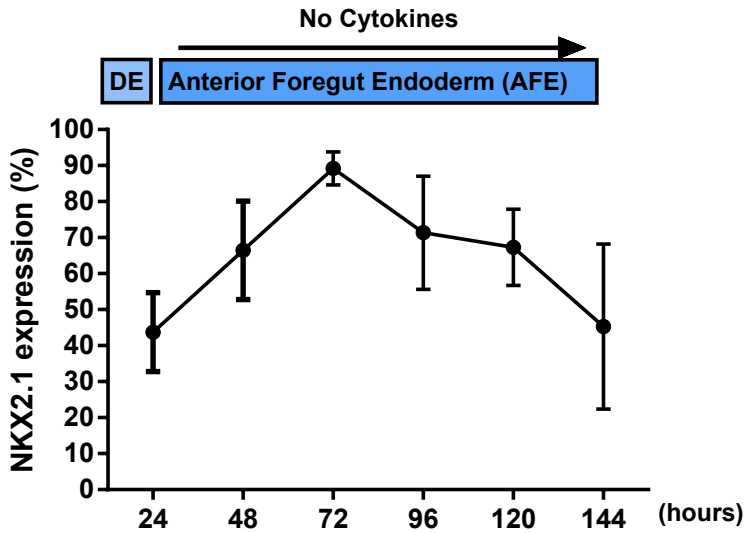

E

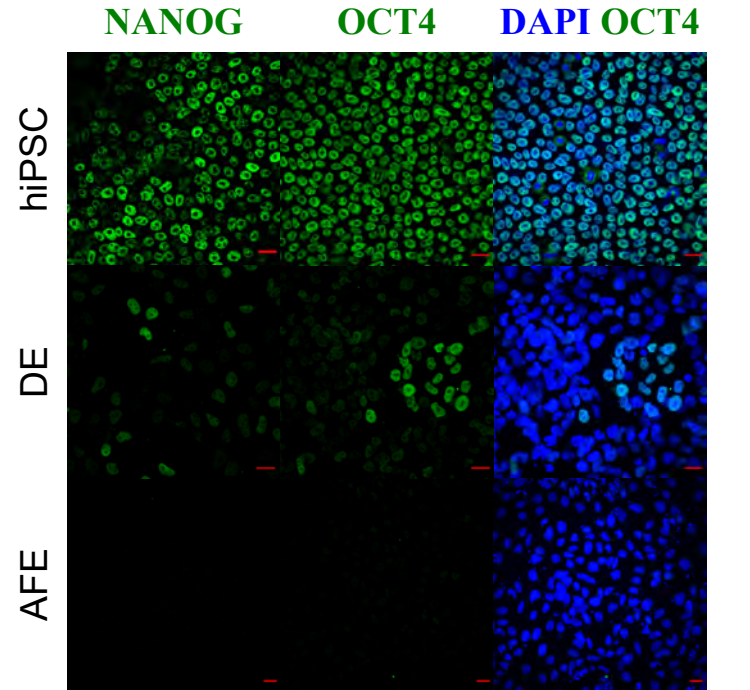

F

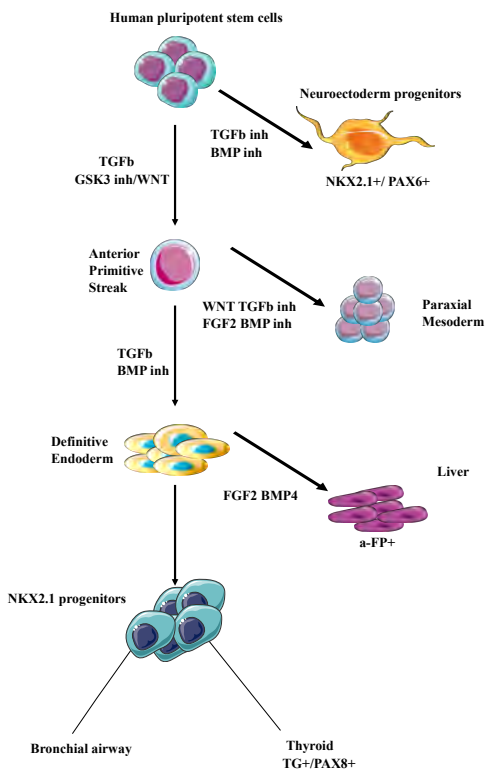

G

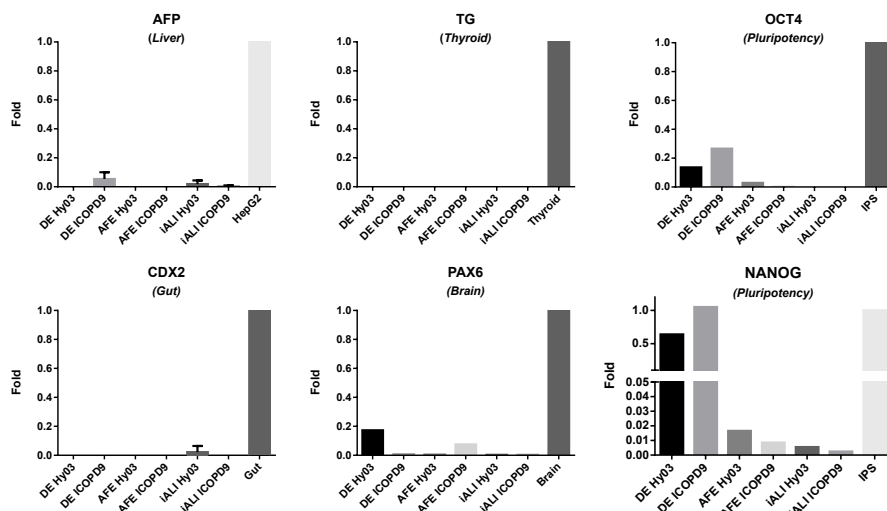

# Figure 5

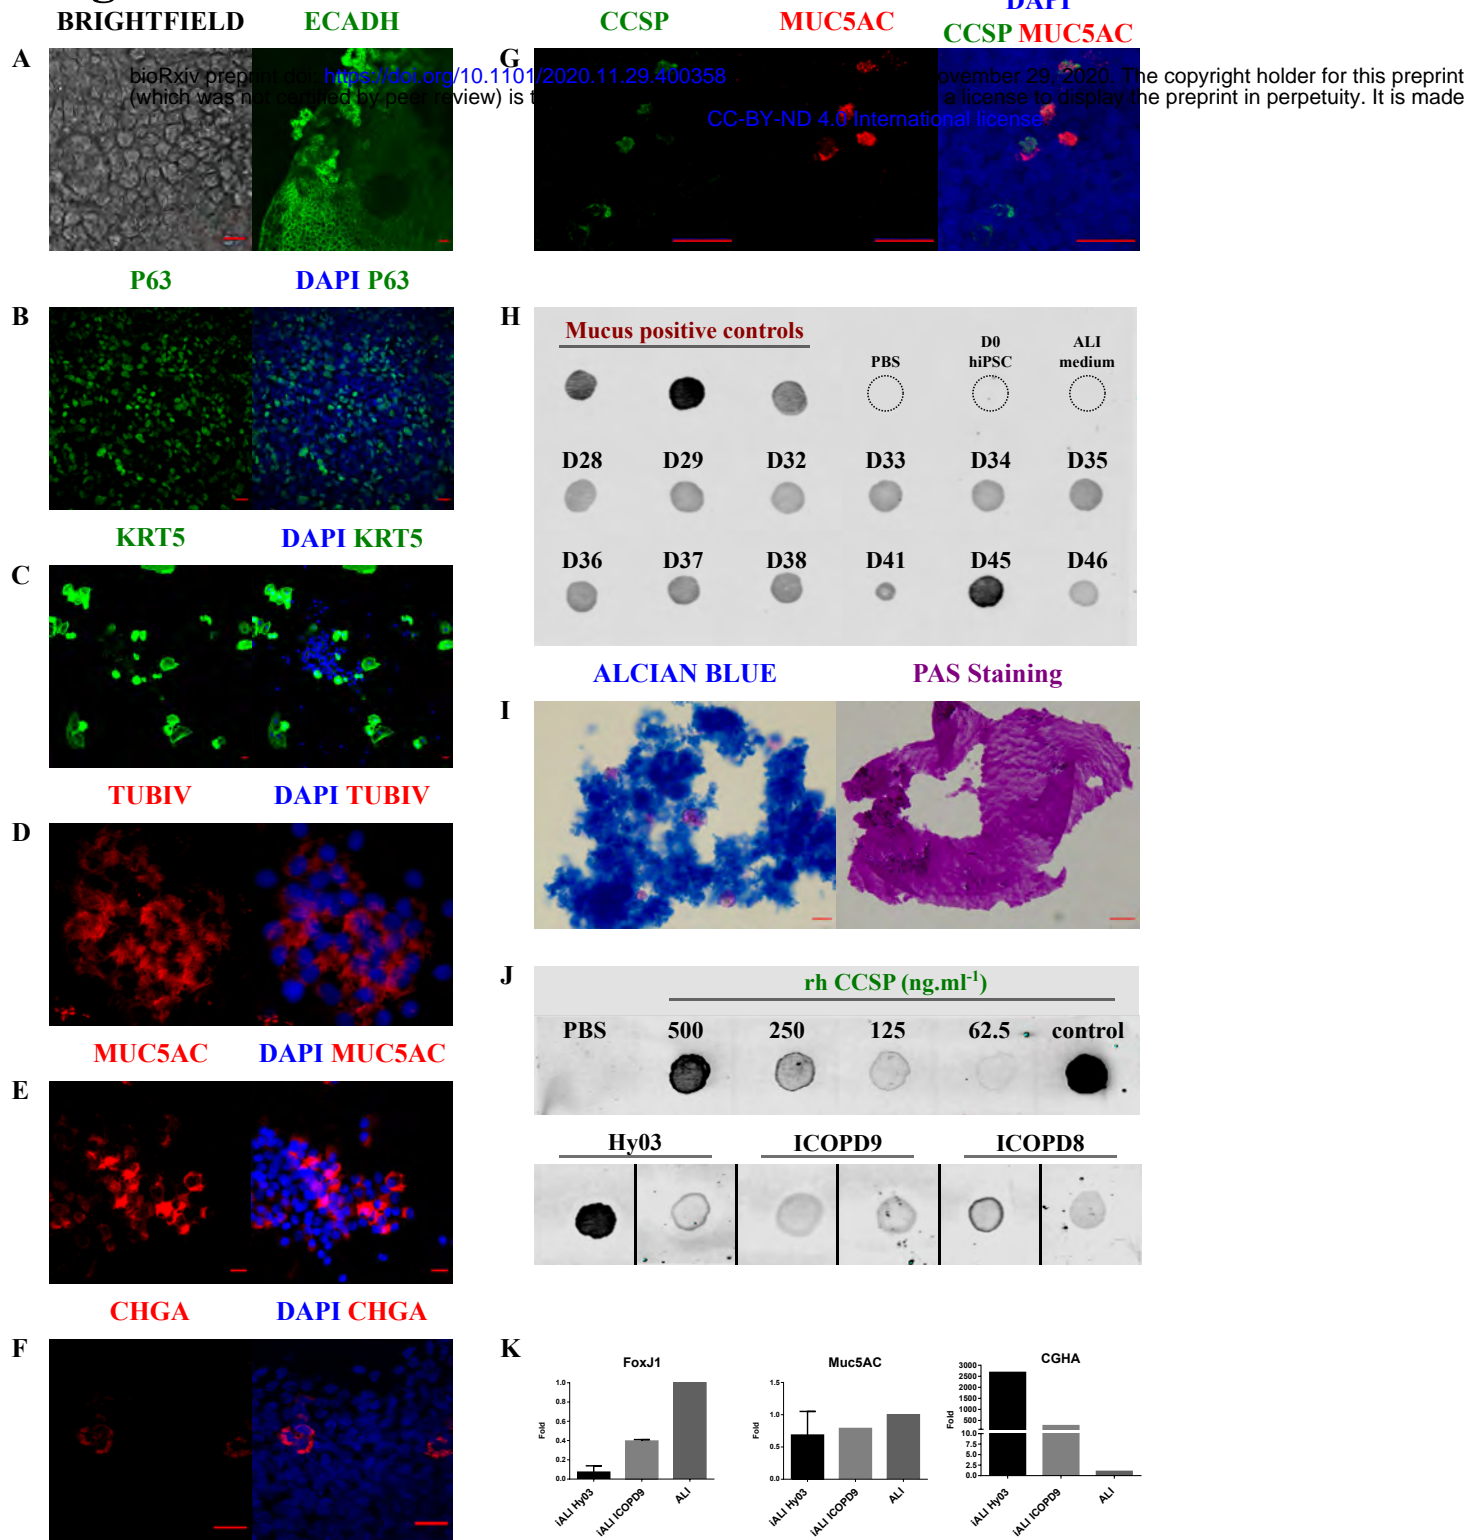

bioRxiv preprint doi: <https://doi.org/10.1101/2020.11.29.400358>; this version posted November 29, 2020. The copyright holder for this preprint (which was not certified by peer review) is the author/funder, who has granted bioRxiv a license to display the preprint in perpetuity. It is made available under aCC-BY-ND 4.0 International license.

bioRxiv preprint doi: <https://doi.org/10.1101/2020.11.29.400358>; this version posted November 29, 2020. The copyright holder for this preprint (which was not certified by peer review) is the author/funder, who has granted bioRxiv a license to display the preprint in perpetuity. It is made available under aCC-BY-ND 4.0 International license.

# Figure 6

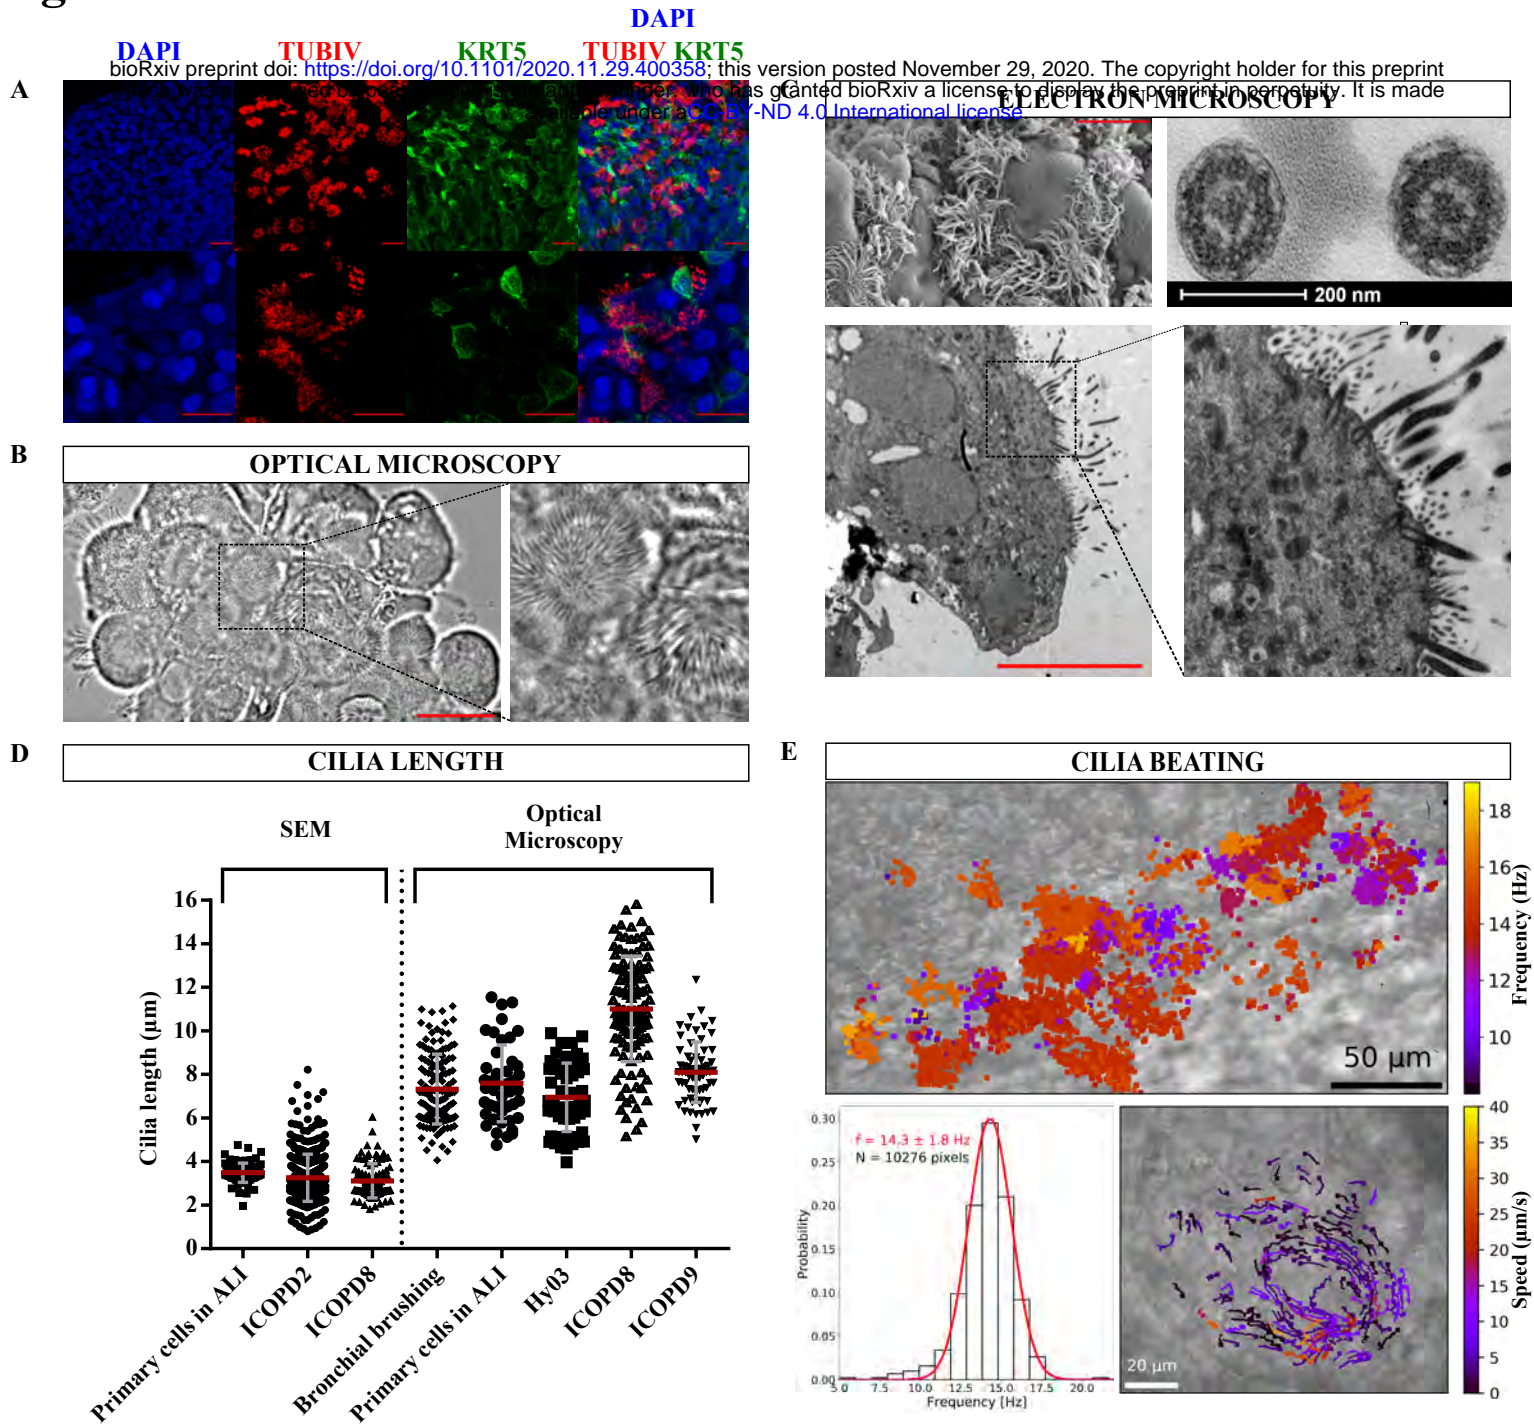

Source: http://biorxiv.org/content/10.1101/2020.11.29.400358v1.full.pdf
